# Supplementary material for: Association of carotid intima-media thickness with the risk of sudden sensorineural hearing loss
Source: PeerJ. 2020 Jun 3;8:e9276. doi: 10.7717/peerj.9276 (PMC7275684; doi:10.7717/peerj.9276)
Supplement: Supplemental Information 1 [file peerj-08-9276-s001.xls]

## Sheet: case 
sex	age	Average IMT	side	Vertigo	Smoking	DM	H/T	Pre-500	Pre-1000	Pre-2000	Pre-4000	Pre-8000	Pre-average	Final-500	Final-1000	Final-2000	Final-4000	Final-8000	Final-average
0	77	0.67	2	0	0	0	1	70	70	65	60	80	66.25	20	50	35	50	60	38.75
0	69	1.05	2	0	0	0	0	40	35	45	90	100	52.5	20	15	25	50	70	27.5
0	40	0.54	1	0	0	0	0	25	30	35	40	50	32.5	15	15	25	20	15	18.75
1	50	0.645	2	0	0	0	0	40	70	60	105	105	68.75	40	55	55	90	90	60
1	53	0.82	2	0	0	1	1	45	40	40	55	65	45	30	35	40	65	70	42.5
0	51	0.605	1	0	0	0	0	70	75	75	70	75	72.5	45	75	75	75	75	67.5
0	54	0.61	2	0	0	1	0	90	95	90	80	90	88.75	20	30	35	75	80	40
1	64	0.615	1	1	0	0	1	65	65	65	65	80	65	10	15	20	75	100	30
1	49	0.515	1	0	1	0	0	50	40	55	70	80	53.75	50	40	50	70	80	52.5
0	48	0.49	1	0	0	0	0	65	60	55	55	60	58.75	20	10	15	20	40	16.25
1	46	0.55	1	0	0	0	0	70	75	70	75	75	72.5	95	90	80	75	70	85
1	56	0.505	1	0	0	1	1	85	80	80	60	50	76.25	50	40	35	25	35	37.5
1	26	0.555	2	1	0	0	0	100	110	110	110	110	107.5	45	65	80	90	100	70
1	51	0.845	1	0	0	0	1	95	90	80	70	75	83.75	15	30	40	65	70	37.5
0	51	0.665	1	1	0	0	1	40	50	45	45	70	45	20	25	30	20	30	23.75
0	58	0.56	2	1	0	0	0	110	110	110	110	110	110	55	60	80	100	110	73.75
0	45	0.535	1	0	0	0	0	45	45	20	15	10	31.25	50	40	10	15	10	28.75
0	55	0.58	2	1	0	1	0	65	65	65	75	90	67.5	20	40	70	70	75	50
0	71	0.775	2	1	0	1	1	110	110	85	90	90	98.75	25	70	60	70	80	56.25
1	80	1.11	2	1	0	0	1	110	110	110	110	110	110	100	100	110	110	110	105
1	60	0.645	2	0	0	0	1	90	85	85	85	90	86.25	45	50	60	75	80	57.5
0	67	0.695	1	1	0	0	0	80	100	110	110	110	100	110	110	110	110	110	110
1	69	0.995	2	1	1	0	1	110	110	110	110	105	110	70	85	85	95	85	83.75
1	65	0.825	1	0	0	0	1	110	105	70	80	100	91.25	110	110	110	110	110	110
0	58	0.93	1	0	0	0	0	25	35	60	65	50	46.25	20	25	30	55	45	32.5
0	20	0.465	2	1	0	0	0	75	75	70	70	65	72.5	15	10	10	5	10	10
1	51	0.585	2	1	1	0	0	50	70	40	25	40	46.25	20	15	20	15	45	17.5
0	57	0.735	2	1	0	0	0	65	60	50	25	30	50	20	20	10	5	10	13.75
0	39	0.735	2	0	0	0	0	50	60	55	40	20	51.25	20	20	20	20	25	20
1	34	0.54	1	1	1	0	0	110	110	110	110	105	110	110	110	110	110	105	110
0	63	0.685	1	0	0	0	0	95	85	80	75	95	83.75	25	20	25	50	70	30
1	58	0.81	1	0	0	1	0	85	80	75	60	70	75	20	20	20	25	35	21.25
1	45	0.525	1	0	1	1	1	80	90	85	90	85	86.25	30	55	55	75	65	53.75
0	22	0.425	1	1	0	0	0	50	60	60	55	70	56.25	40	45	45	50	60	45
1	53	0.55	1	1	0	0	0	95	100	110	110	105	103.75	100	110	110	110	110	107.5
0	72	1.09	2	0	0	0	1	110	110	110	110	105	110	110	110	110	10	105	85
0	44	0.545	1	1	0	0	0	105	95	90	80	85	92.5	20	15	20	20	20	18.75
1	58	1.36	1	0	0	0	0	80	80	85	110	105	88.75	85	85	90	100	105	90
1	43	0.605	2	1	0	0	0	75	70	60	45	35	62.5	70	70	55	35	25	57.5
1	39	0.725	1	0	0	0	0	60	80	65	60	50	66.25	5	15	10	20	20	12.5
0	66	1.22	1	0	0	0	0	70	25	50	40	55	46.25	35	15	40	30	65	30
1	58	1.33	1	0	0	1	1	75	85	80	75	70	78.75	5	20	25	55	70	26.25
0	42	0.6	1	1	0	0	0	70	75	60	60	80	66.25	65	60	60	60	80	61.25
1	62	0.62	2	0	1	0	1	75	75	65	60	70	68.75	50	50	15	35	55	37.5
0	61	1.085	2	1	0	0	1	40	45	20	20	45	31.25	15	20	25	15	25	18.75
0	65	1.145	2	1	0	1	1	75	80	70	80	85	76.25	50	40	20	35	50	36.25
1	51	0.78	1	0	1	0	0	35	35	40	50	50	40	20	30	25	40	55	28.75
0:female, 1:male			1:left, 2:right	0:no, 1:yes	0:no, 1:yes	0:no, 1:yes	0:no, 1:yes

## Sheet: control
age	sex	Average IMT	Smoking	DM	H/T
20	0	0.445	0	0	0
22	0	0.46	0	0	0
39	0	0.545	0	1	0
40	0	0.525	0	0	0
44	0	0.62	0	1	0
45	0	0.56	0	0	1
48	0	0.565	0	0	1
49	0	0.545	0	0	0
51	0	0.625	0	0	0
53	0	0.62	0	0	0
54	0	0.645	0	0	1
55	0	0.63	0	0	0
56	0	0.555	0	0	0
58	0	0.655	0	0	0
63	0	0.56	0	0	0
65	0	0.635	0	0	0
26	1	0.445	0	0	0
34	1	0.54	0	0	0
43	1	0.445	0	0	0
45	1	0.6	0	1	0
46	1	0.565	0	0	0
49	1	0.66	1	0	0
50	1	0.595	0	0	1
52	1	0.55	0	0	0
52	1	0.545	0	0	0
53	1	0.58	0	0	0
53	1	0.765	0	0	0
56	1	0.54	0	0	1
57	1	0.63	0	0	0
59	1	0.735	0	0	1
62	1	0.855	0	0	1
65	1	1.015	1	0	0
65	1	0.64	1	1	0
	0:female, 1:male		0:no, 1:yes	0:no, 1:yes	0:no, 1:yes
