# Supplementary material for: Association of carotid intima-media thickness with the risk of sudden sensorineural hearing loss
Source: PeerJ. 2020 Jun 3;8:e9276. doi: 10.7717/peerj.9276 (PMC7275684; doi:10.7717/peerj.9276)
Supplement: Supplemental Information 2 [file peerj-08-9276-s002.xlsx]

## Sheet: 工作表1
	0	1			1	2
sex	female	male		side	left	right
vertigo	no	yes
smoking	no	yes
DM	no	yes
H/T	no	yes
